# Supplementary material for: Evaluation of the efficacy and cost-effectiveness of safinamide versus rasagiline: a systematic review
Source: Atypon-hosted journal article supplement (doi:10.57264/cer-2025-0031), 2025-08-14
Supplement: supplementary tables.docx [file supplementary%20tables.docx]

**Supplementary Tables**

**Supplementary table 1**. Costs used in pharmacoeconomic analysis

|  | **Rasagiline** | **Safinamide** |
| --- | --- | --- |
| **Dose**  **Content**  **EFP**  **EFP Annual cost** | 1 mg  30 tablets  58.50  711.75 | 50/100 mg  30 tablets  75.68  920.77 |

EFP= Ex-factory price; RP=Retail price

**Supplementary table 2**. LHH

| **Treatment** | **NNT**  **(UPDRS)** | **Outcome** | **NNH** | **LHH** |
| --- | --- | --- | --- | --- |
| **Rasagiline** | 8 | **SAEs** | 83 | 10.38 |
| **Safinamide** | 6 | 135 | 22.50 |
| **Rasagiline** | 8 | **Withdrawals** | 214 | 26.75 |
| **Safinamide** | 6 | 460 | 76.67 |

**Supplementary table 3**. NNT of drugs adjusted for risk of an adverse event (NEAR) vs. placebo

|  | **NNT-NEAR** | |
| --- | --- | --- |
| **Rasagiline** | **Safinamide** |
| **SAE** | 6.71 (3.45-100,08) | 5,59 (3.15-26.40) |
| **Withdrawals** | 6.82 (3.47-138.09) | 5.68 (3.17-28.98) |

**Supplementary table 4**. NNT of efficacy parameters

|  | **Rasagiline** | **Safinamide** |
| --- | --- | --- |
| **OFF time (h)** | 22.73 (19.33-27.91) | 5,20 (5.07-5.28) |
| **ON time (h)** | 17.28 (16.02-19.53) | 10,34 (10.06-10.39) |
| **UPDRS** | 9.62 (9.45-9.82) | 7.72 (7.70-7.72) |

*Note: Calculated from Diff & Diff analysis*

**Supplementary table 5**. Cost-effectiveness analysis (per year)

| **Treatment** | **Cost x NNT** |
| --- | --- |
| **Rasagiline** | 5,694 (4,271, 8,541) |
| **Safinamide** | 5,525 (3,683, 9,208) |
|  | **Cost x NNT-NEAR-SAE** |
| **Rasagiline** | 4,776 (2,456, 71,232) |
| **Safinamide** | 5,147 (2,900, 24,308) |
|  | **Cost x NNT-NEAR-Withdrawals** |
| **Rasagiline** | 4,854 (2,470, 98,286) |
| **Safinamide** | 5,230 (2,919, 26,684) |
|  | **Cost x NNT-Off time** |
| **Rasagiline** | 16,178 (13,758, 19,865) |
| **Safinamide** | 4,788 (4,678, 4,862) |
|  | **Cost x NNT-On time** |
| **Rasagiline** | 12,299 (11,402, 13,900) |
| **Safinamide** | 9,521 (9,263, 9,567) |
|  | **Cost x NNT-UPDRS** |
| **Rasagiline** | 6,847 (6,726, 6,989) |
| **Safinamide** | 7,108 (7,090, 7,108) |

Ex-factory price costs used: Rasagiline; 711.75€/year; Safinamide: 920.77€/year

**Supplementary table 6**. Incremental cost-effectiveness analysis (per year)

| **Treatment** | **NNT efficacy** | **difference** | **NNT ICER Safinamide vs Rasagiline** |
| --- | --- | --- | --- |
| **Rasagiline** | 0.12500 | 0.04167 | 5,016.16 |
| **Safinamide** | 0.16667 |
|  | **NNT-NEAR-SAE efficacy** | **NNT-NEAR-SAE efficacy difference** | **NNT-NEAR-SAE ICER Safinamide versus Rasagiline** |
| **Rasagiline** | 0.14903 | 0.02986 | 7,000.11 |
| **Safinamide** | 0.17889 |
|  | **NNT-NEAR-Withdrawals efficacy** | **NNT-NEAR-Withdrawals efficacy difference** | **NNT-NEAR-Withdrawals ICER Safinamide versus Rasagiline** |
| **Rasagiline** | 0.14663 | 0.02943 | 7,102.39 |
| **Safinamide** | 0.17606 |
|  | **NNT-Time Off efficacy** | **NNT-Time Off efficacy difference** | **NNT-Time Off ICER Safinamide versus Rasagiline** |
| **Rasagiline** | 0.04399 | 0.14831 | 1,409.27 |
| **Safinamide** | 0.19231 |
|  | **NNT-Time On efficacy** | **NNT-Time On efficacy difference** | **NNT-Time On ICER Safinamide versus Rasagiline** |
| **Rasagiline** | 0.05787 | 0.03884 | 5,381.65 |
| **Safinamide** | 0.09671 |
|  | **NNT-UPDRS efficacy** | **NNT-UPDRS efficacy difference** | **NNT-UPDRS ICER Safinamide versus Rasagiline** |
| **Rasagiline** | 0.10395 | 0.02558 | 8,171.36 |
| **Safinamide** | 0.12953 |

ICER: Incremental Cost-Effectiveness Analysis

Ex-factory price cost used: Rasagiline; 711.75€/year; Safinamide: 920.77€/year
